# Supplementary material
Source: PubMed Central journal article supplement (PMC3378913)

# Occludin, ZO1, Claudin-5 at E17.5 and P0

## Zipper at E17.5

## Buttons at P0

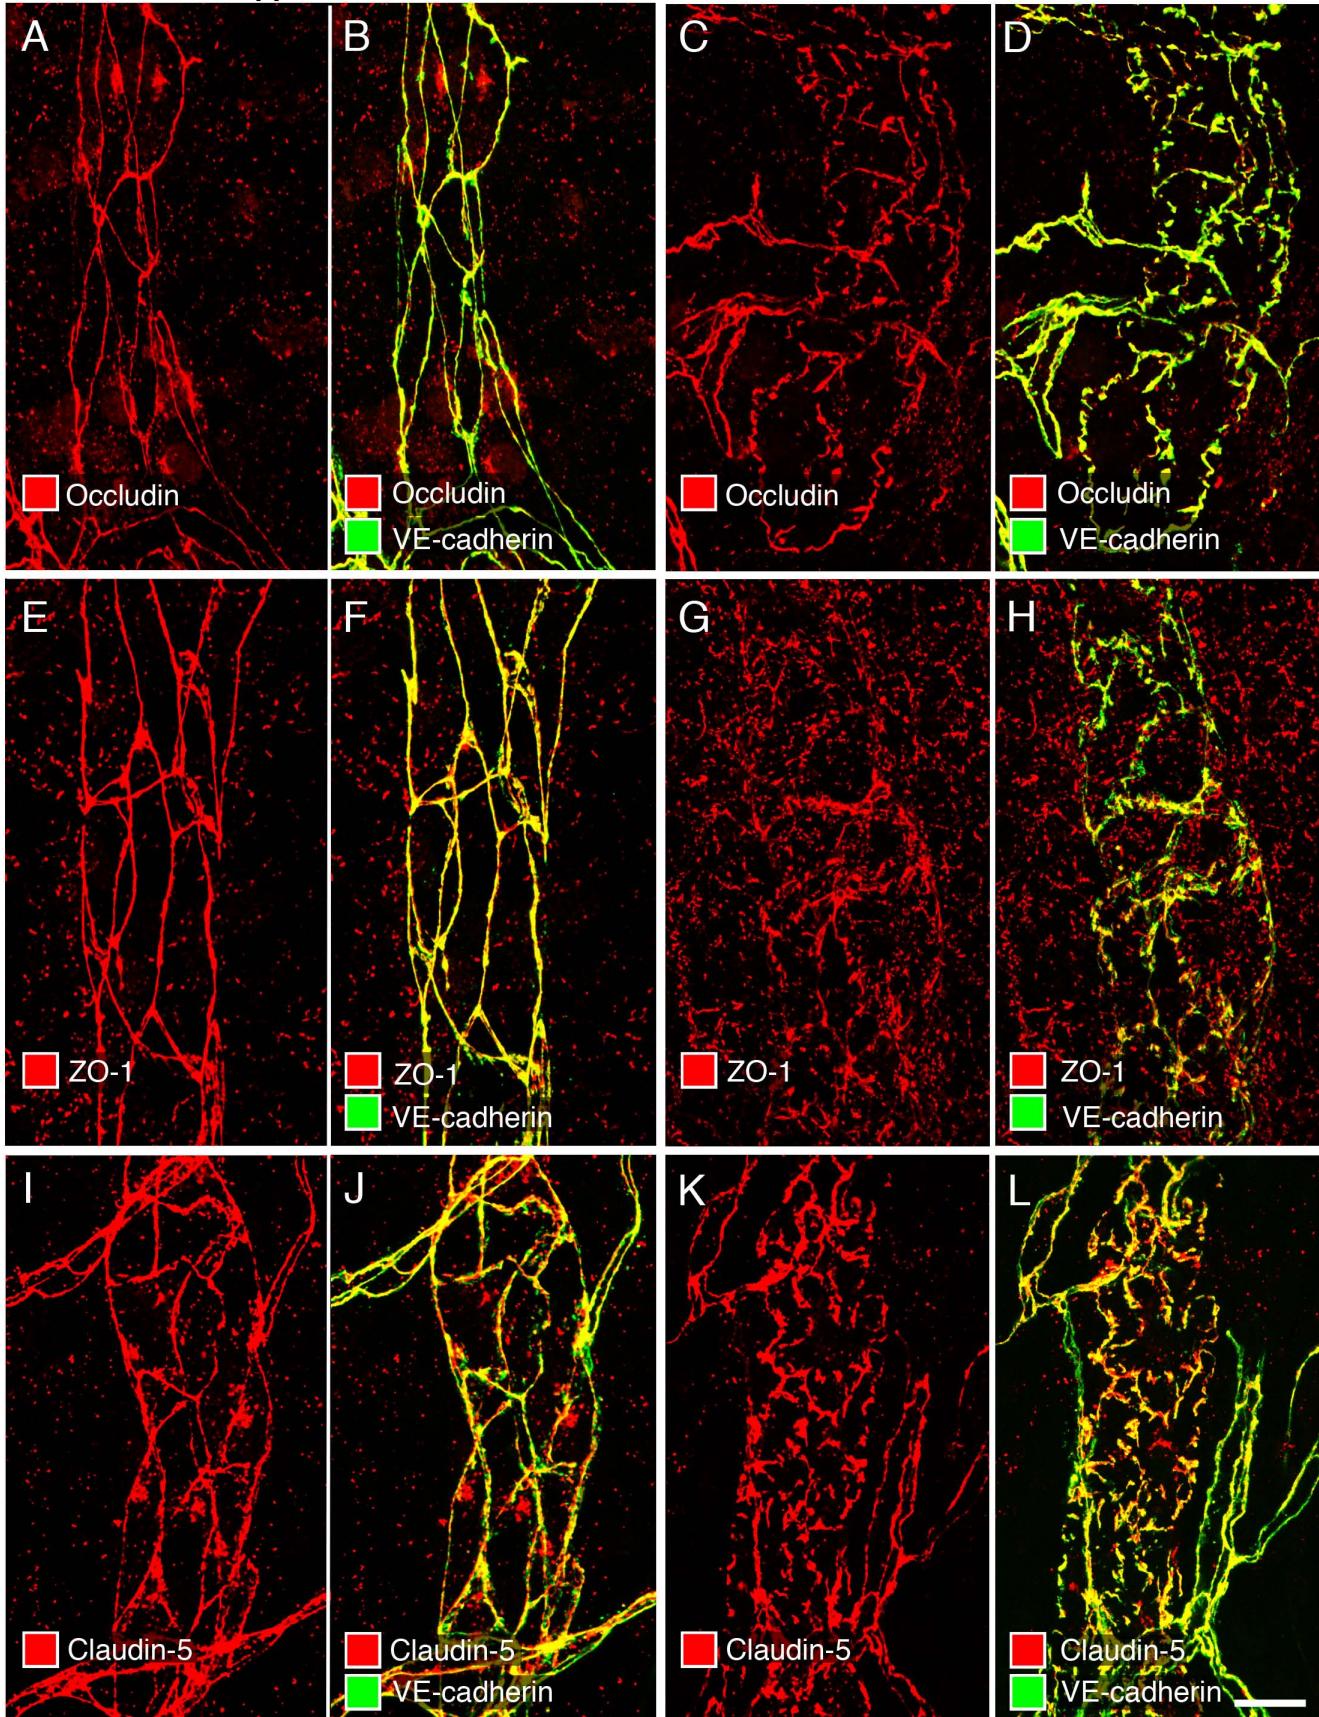

Supplement: mmc1.pdf [file mmc1.pdf]

# Claudin-5 immunoreactivity of P28 mouse trachea

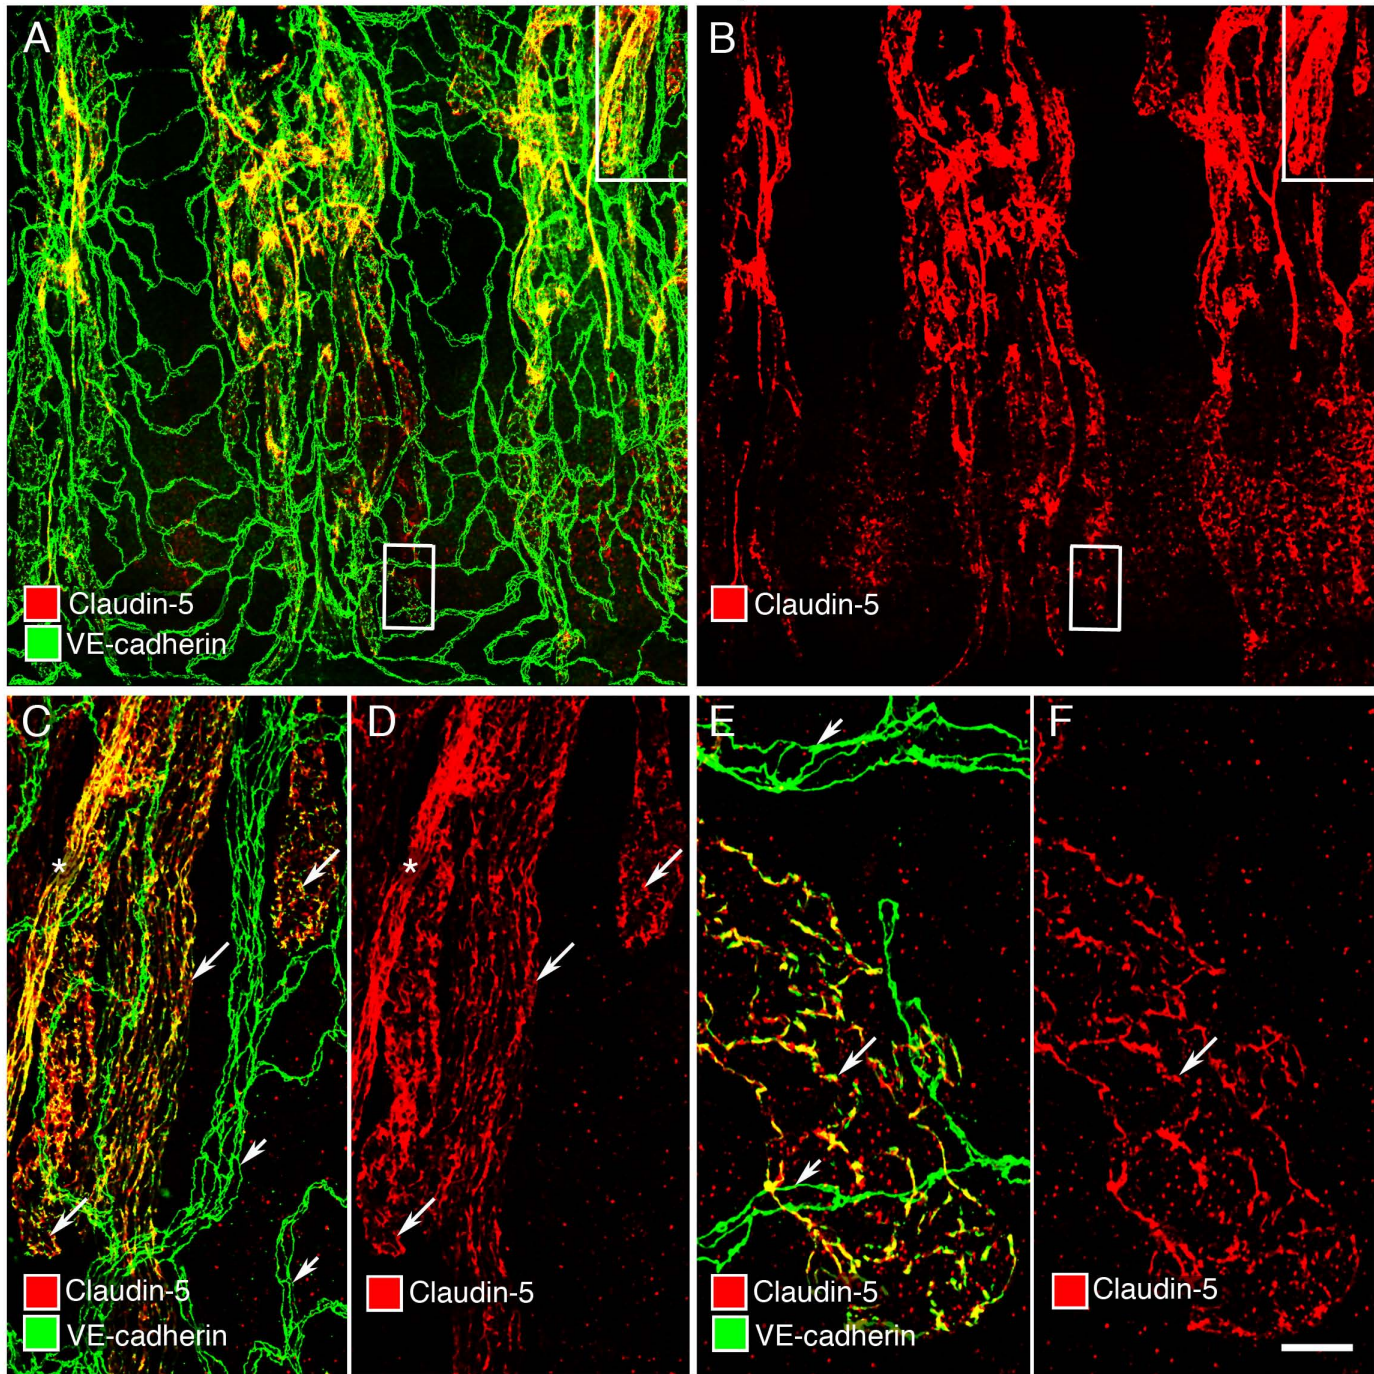

Supplement: mmc2.pdf [file mmc2.pdf]
